# Supplementary material for: A novel panel based on immune infiltration and tumor mutational burden for prognostic prediction in hepatocellular carcinoma
Source: publisher site journal article supplement (doi:10.18632/aging.202670), 2021-03-10
Supplement: Supplementary file [file aging-v13i6-202670-supplementary-material-SD2.pdf]

**SUPPLEMENTARY FIGURES**

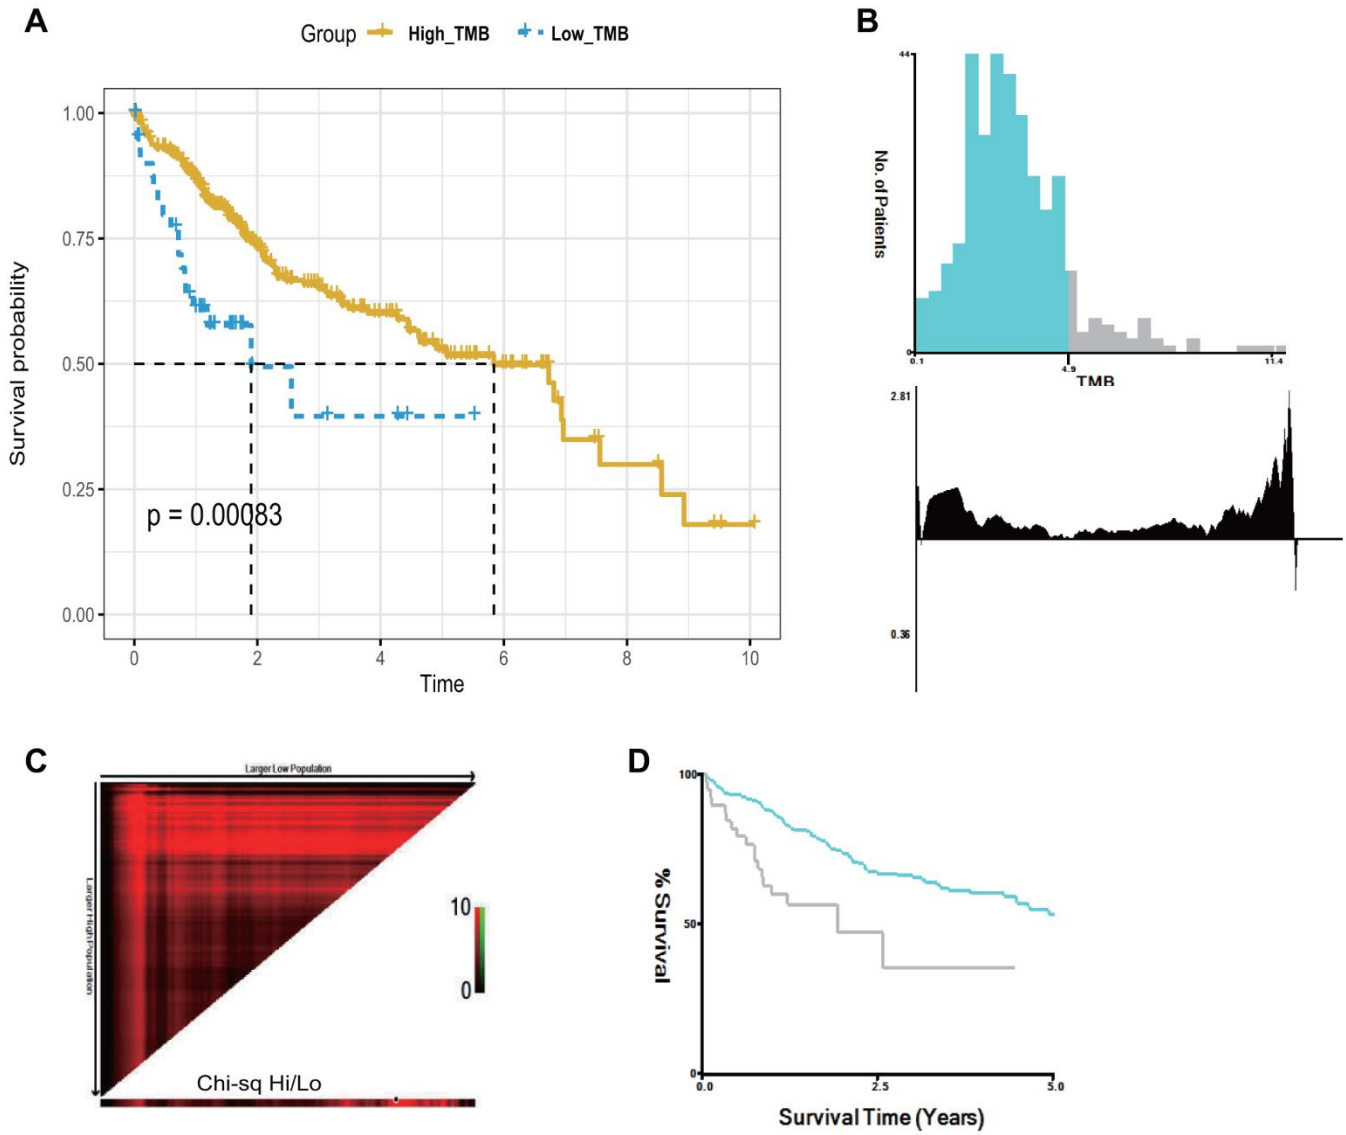

**Supplementary Figure 1. Results of X-tile analysis of 374 HCC patients in TCGA database. (A, D) Survival curve after the optimal cutoff value was calculated by X-tile analysis,  $P < 0.001$ . (B, C) Risk distribution, and the determination of best cutoff value of tumor mutation burden (TMB).**

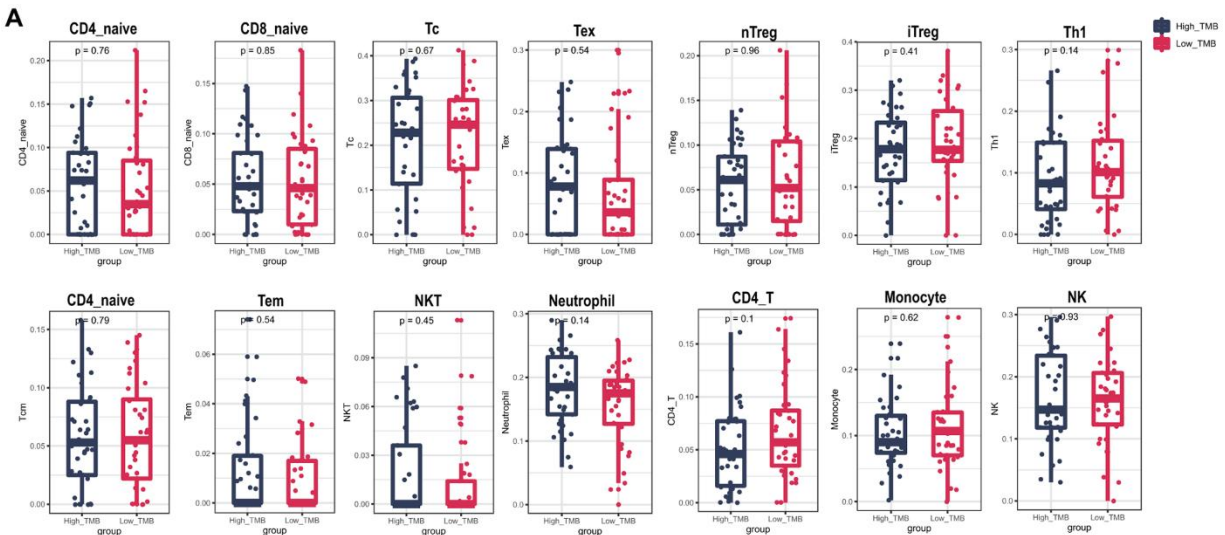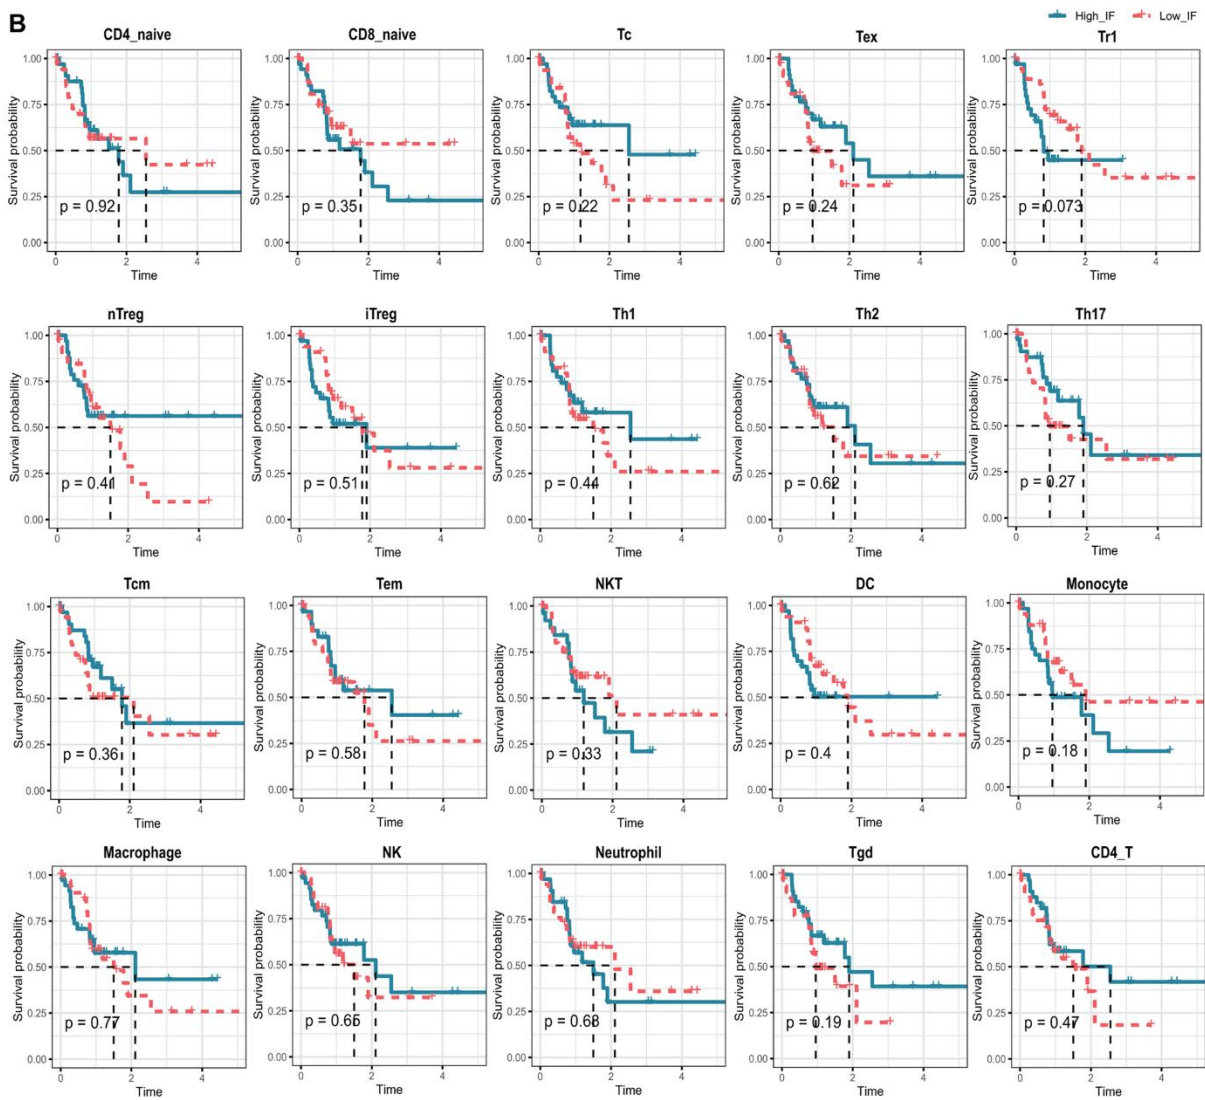

**Supplementary Figure 2. The remaining types of immune infiltrating cells between different groups and survival analysis. (A) 14 types of immune cell infiltration, in addition to the immune cells listed in Figure 2. (B) Survival analysis of other immune infiltrating cells, in addition to the five immune cells shown in Figure 2.**

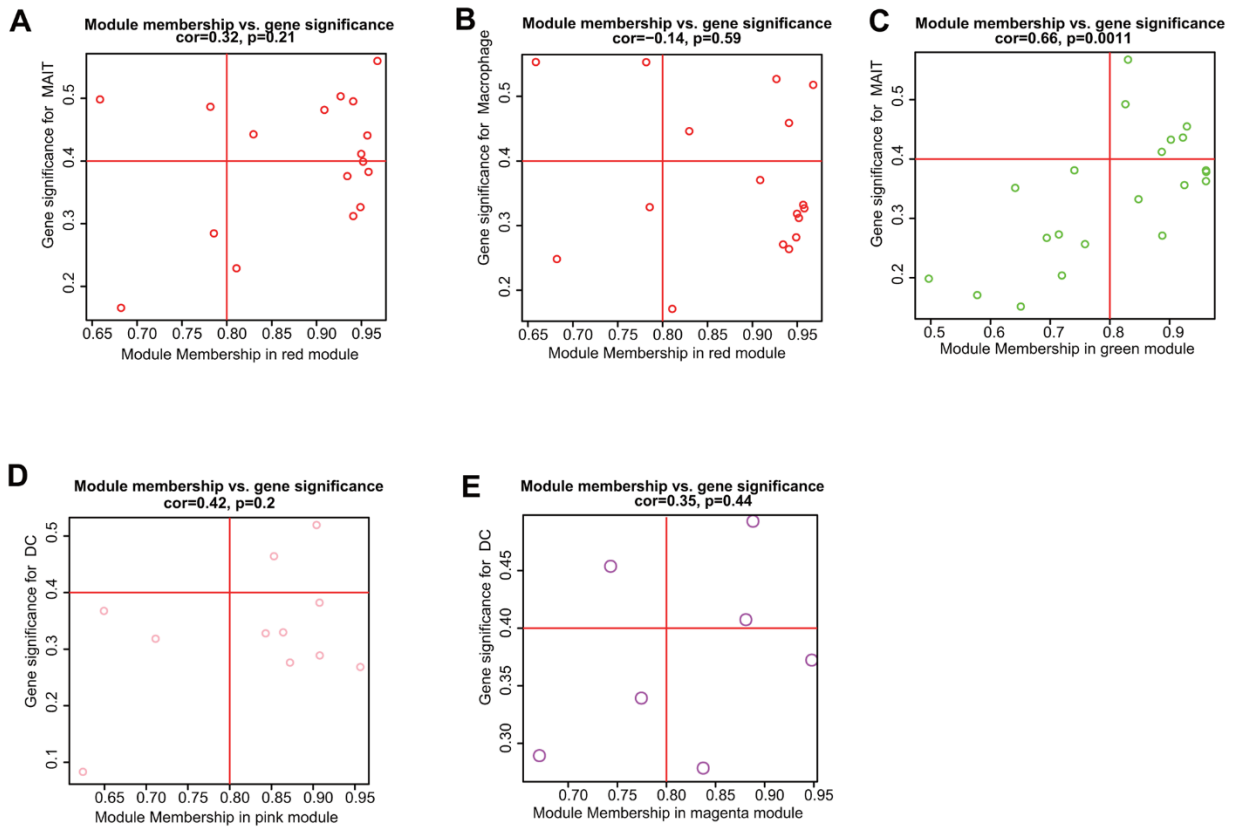

**Supplementary Figure 3. Immune related gene modules of WGCNA analysis.** (A–E) Immune related genes in red, green, pink and magenta modules.

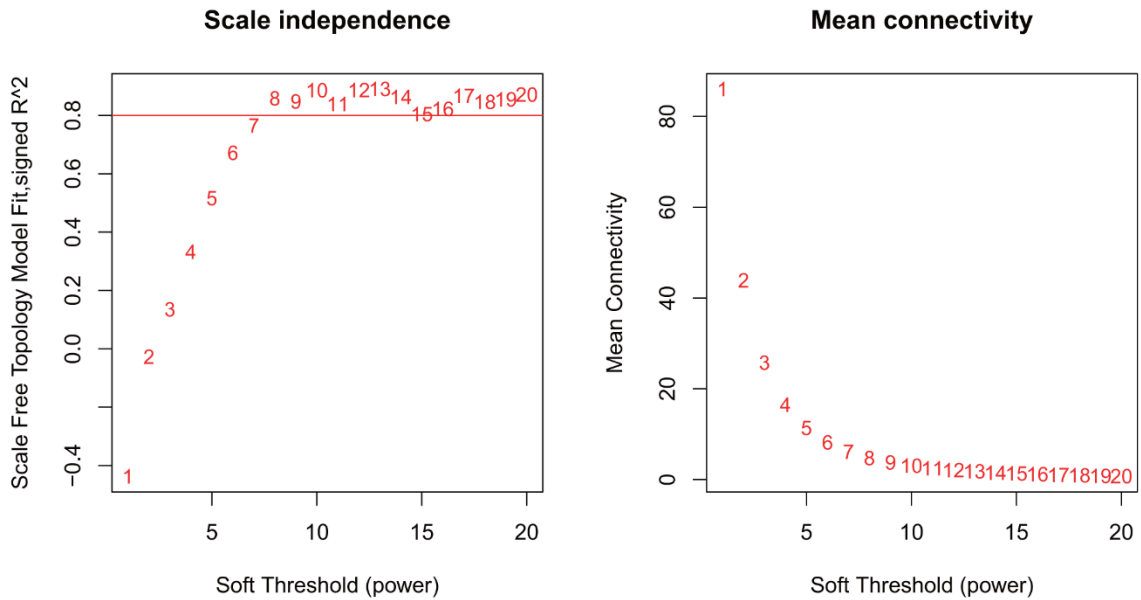

**Supplementary Figure 4. The soft threshold selected in this experiment in the process of WGCNA analysis.**
